# Supplementary material for: Using Taxol-sensitized budding yeast to investigate the effect of microtubule stabilization on anaphase onset
Source: PubMed Central journal article supplement (PMC10469069; doi:10.1016/j.xpro.2023.102522), 2023-08-18
Supplement: mmc1.pdf [file mmc1.pdf]

Supplemental Table 1: Yeast strains used, related to G1 release assay Step 1, Cdc20 release assay Step 20, and Taxol sensitive spotting assay Step 54.

| <b>Strain</b> | <b>Genotype</b>                                                                                                                                                                                          | <b>Figure</b> |
|---------------|----------------------------------------------------------------------------------------------------------------------------------------------------------------------------------------------------------|---------------|
| MGY1293       | MATa, <i>tub2-25(A19K-T23V-G26D-Y270F)</i> , <i>erg6::HIS3</i> , <i>pdr1::hygB</i> , <i>pdr3::NAT</i> , <i>his3Δ200</i> , <i>leu2Δ1</i> , <i>ura3-52</i> , <i>trp1Δ63</i> , <i>pMET3-3xHA-CDC20-TRP1</i> | 2, 3          |
| MGY2150       | MATa, <i>tub2-25(A19K-T23V-G26D-Y270F)</i> , <i>erg6::TRP1</i> , <i>pdr1::hygB</i> , <i>pdr3::NAT</i> , <i>his3Δ200</i> , <i>leu2Δ1</i> , <i>ura3-52</i> , <i>trp1Δ63</i>                                | 1, 3, Table 3 |
| MGY1872       | MATa, <i>TUB2</i> , <i>erg6::TRP1</i> , <i>pdr1::hygB</i> , <i>pdr3::NAT</i> , <i>his3Δ200</i> , <i>leu2Δ1</i> , <i>ura3-52</i> , <i>trp1Δ63</i>                                                         | 4             |
| MGY1874       | MATa, <i>tub2-25(A19K-T23V-G26D-Y270F)</i> , <i>erg6::TRP1</i> , <i>pdr1::hygB</i> , <i>pdr3::NAT</i> , <i>his3Δ200</i> , <i>leu2Δ1</i> , <i>ura3-52</i> , <i>trp1Δ63</i>                                | 4             |
| MGY2104       | MATa, <i>tub2-25(A19K-T23V-G26D-Y270F)</i> , <i>erg6::TRP1</i> , <i>pdr1::hygB</i> , <i>pdr3::NAT</i> , <i>his3Δ200</i> , <i>leu2Δ1</i> , <i>ura3-52</i> , <i>trp1Δ63</i> , <i>bub3::G418</i>            | 4             |
